# Supplementary material for: CARF enrichment promotes epithelial–mesenchymal transition via Wnt/β-catenin signaling: its clinical relevance and potential as a therapeutic target
Source: PubMed Central journal article supplement (PMC5945778; doi:10.1038/s41389-018-0048-4), 2018-05-11

# **SUPPLEMENTARY INFORMATION -**

## **CARF Enrichment Promotes Epithelial-mesenchymal Transition via Wnt/ $\beta$ -catenin Signaling: Its Clinical Relevance and Potential as a Therapeutic Target**

Rajkumar S. Kalra<sup>1</sup>, Anupama Chaudhary<sup>1</sup>, A-Rum Yoon<sup>2</sup>, Priyanshu Bhargava<sup>1</sup>, Amr Omar<sup>1</sup>, Sukant Garg<sup>1</sup>, Chae-Ok Yun<sup>2</sup>, Sunil C. Kaul<sup>1</sup>, and Renu Wadhwa<sup>1</sup>

<sup>1</sup>Drug Discovery and Assets Innovation Lab, DBT-AIST International Laboratory for Advanced Biomedicine (DAILAB), DAICENTER, National Institute of Advanced Industrial Science & Technology (AIST), Tsukuba, Ibaraki 305-8565, Japan.

<sup>2</sup>Department of Bioengineering, College of Engineering, Hanyang University, Seongdong-gu, Seoul, Korea.

**Summary - Supplementary Information includes details of employed supplementary methods, legends to supplementary figures, details of antibodies used, and primer sequences used for Q-PCR, RT (Reverse Transcriptase)-PCR and genomic-PCR amplifications.**

## **Supplementary Information: List of contents -**

**Supplementary methods**

**Legends to the Supplementary Figures -**

**Supplementary Figure 1**

**Supplementary Figure 2**

**Supplementary Figure 3**

**Supplementary Figure 4**

**Supplementary Figure 5**

**Supplementary Figure 6**

**Supplementary Figure 7**

**Supplementary Figure 8**

**Supplementary Figure 9**

**Table S1: Detail of antibodies used in immunoblotting and immunofluorescence.**

**Table S2: Detail of primers used for RT-PCR amplifications.**

## **SUPPLEMENTARY METHODS-**

TCGA, Oncomine and HPA analyses

Patient data information for CARF genomic amplifications, and its expression levels (mRNA expression, RNA-Seq & V2 values) were analyzed across datasets (data sets of circulating/blood-born, and neurological malignancies omitted amongst metastatic analyses) using TCGA portal (<http://www.cbioportal.org/index.do>). Analyses of amplification frequencies of genes listed in TCGA-defined Invasion/Metastases and Angiogenesis datasets were taken to examine their status in altered ( $n=10$ ) and unaltered ( $n=97$ ) patient cohort for CARF amplification in Prostate cancer (Neuroendocrine, NEPC; Trento/Cornell/Broad 2016) dataset, retaining highest % of CARF amplification.

Also, NEPC dataset was explored to retrieve expression data (*p value*, Log odds ratio) of genes involved in Wnt/ $\beta$ -catenin signaling, whereas gene list was obtained from KEGG ([http://www.genome.jp/dbget-bin/get\\_linkdb?-t+8+path:map04310](http://www.genome.jp/dbget-bin/get_linkdb?-t+8+path:map04310)) pathways. Gene expression data of customized  $\beta$ -catenin gene (direct and indirect) targets was also analyzed in NEPC dataset. Furthermore, taking CTTNB1, TGFB1, EGFR, ERBB2 and NOTCH1 amplification frequencies in in top 10 datasets; status of CARF/CDKN2AIP respectively was analyzed in these datasets. Similarly, information on amplification frequencies of the  $\beta$ -catenin interactors CTTNB1, DVL2, TCF4, LEF1 and JUN of transcriptional complex, and other key genes involved in Wnt/ $\beta$ -catenin signaling also retrieved in top 10 datasets, and was analyzed for CARF status. The Oncomine (<https://www.oncomine.org/>), an online portal of cancer microarray database was used to analyze CARF expression across normal and tumor types using differential expression algorithm. Expression data was plotted as log<sub>2</sub> median-centered intensity. The Human Protein Atlas (HPA; <http://www.proteinatlas.org/>), an antibody-based proteomic expression database was explored to examine CARF protein expression in normal versus cancer tissues sections. The immunohistochemical data from the HPA was retrieved and quantitated for CARF expression in various normal, cancer and breast cancer sample sections (normal, lobular and ductal carcinomas).

#### *In vivo* xenograft assays

Mice injected subcutaneously were observed and given intra-tumor (50 $\mu$ L, 50 $\mu$ M) Control and Ambion® In Vivo CARF siRNA (Thermo Fisher Scientific) injections post 2 weeks in 2 control groups respectively. Whereas, mice injected intravenously given control and CARF siRNA (100 $\mu$ L, 50 $\mu$ M) injections intravenously in the tail vein. Control and CARF siRNA injections were repeated twice a week for the next 4.5 weeks. Tumor sizes of in subcutaneously injected mice were measured twice a week on above time points. Mice injected intravenously and subcutaneously were sacrificed by cervical dislocation on 40th day and examined for metastatic foci/sacs in liver and lungs, while subcutaneous tumors were collected in the latter group. To assess the anti-metastatic effect on CARF knockdown, a CARF oncolytic (RdB-shCARF) metastatic lung cancer model was established using A549 cells. A total of  $1 \times 10^6$  firefly luciferase-expressing

A549 cells were injected via tail vein to 6-week old male nude mice (Charles River Korea Inc.). After 4 weeks, bioluminescence imaging was measured to confirm the acquisition of orthotopic lung tumors. Mice were subsequently anesthetized in a chamber containing 2% isoflurane and given intra-peritoneal D-luciferin (150 mg/kg; Caliper, Hopkinton, MA) injections. Metastatic lung tumor-harboring mice were randomized into 3 groups ( $\geq 4$  mice each group) for subsequent treatments, and injected three times every other day with 200  $\mu$ L of PBS, RdB ( $2 \times 10^{10}$  VP), or RdB-shCARF ( $2 \times 10^{10}$  VP). The luminescent images were obtained from the anesthetized mice using the IVIS imaging system (Xenogen, Alameda, CA). In vivo bioluminescence signal intensity was obtained as photons acquired per second (photons/second [p/s]) from a body region of interest.<sup>24</sup> Tumor growth was measured every week by bioluminescence imaging, following the first treatment.

## **LEGENDS TO THE SUPPLEMENTARY FIGURES-**

**Supplementary Figure 1. a**, Gene expression data showing enrichment of CARF mRNA levels in different TCGA cancer datasets; RNA-Seq expressions shown in log<sub>10</sub> scale. **b**, Log<sub>2</sub> CARF expressions as analyzed in normal breast duct, invasive lobular and invasive ductal carcinomas in Thurashvili Breast dataset using Oncomine. **c**, Percentage CARF mRNA enrichment in cancer cell lines having CARF amplification in Cancer Cell Line Encyclopedia (CCLE; Novartis/Broad 2012) dataset of TCGA includes number of circulate/blood-born (#1) and invasive cell lines derived either from primary (#2) or secondary (#3) metastatic tumor site.

**Supplementary Figure 2. a**, Immunoblots showing increased expressions of mesenchymal (n-cadherin, fibronectin, kinesin, and dynein) and invasive (MMP2, MMP9, hnRNP-K, and VEGF) markers in SKOV-3 CARF-GFP cells. **b**, Immunostaining showing increase in vimentin and reduced E-cadherin expression in SKOV-3 CARF-GFP cells, as shown upper; while other mesenchymal (n-cadherin and fibronectin) markers also increased in these cells, shown below. **c**, Immunostaining showing increase in hnRNP-K expression in U2OS CARF-GFP cells.



**Supplementary Figure 3.** Percentage of matched genomic CARF amplifications as analyzed in individual top 10 patient datasets having CTNNB1 **a**, TGFB1 **b**, EGFR **c**, ERBB2 **d**, and NOTCH1 **e** amplifications, represented by opposite red bars from axis base. **f**, Gene expression of the candidate genes involved in Wnt/ $\beta$ -catenin signaling as analyzed in NEPC (Trento/Cornell/Broad 2016) dataset; p value and log odds ratio showing expressions.

**Supplementary Figure 4.** Log odds ratio showing gene expression values of  $\beta$ -catenin targets involved in EMT as analyzed in NEPC (Trento/Cornell/Broad 2016) dataset. Graph showing gene expression values of its indirect (categorized into repressors and activators) target genes in the dataset, as listed on the right are shown next.

**Supplementary Figure 5. a**, Percentage of genomic amplifications of CARF matched with individual top 10 patient datasets having amplifications in CTNNB1, TCF4, LEF1, and JUN genes; while, **b**, showing matched amplification frequencies of CARF with number of  $\beta$ -catenin gene targets including TDG, SIAH1, CSNK1A1, BTRC, FRAT1, MAP3K7, SMAD4, and TLE1 in analyzed NEPC (Trento/Cornell/Broad 2016) dataset.

**Supplementary Figure (6). a**, Transcript levels of the transcription factors (SNAIL1, SNAIL2, ZEB1, and TWIST1) and CDH1 gene validated in SKOV-3 control and CARF-GFP cells; while **b**, showing transcript levels of  $\beta$ -catenin target gene (WNT1, CTNBB1, DVL2, AXIN2, TCF4, and LEF1) in these cells; while **c-d**, showing transcript levels of TGF $\beta$ 1, its receptor TGFBR1, AKT, and FAK in U2OS and SKOV-3 vector control and CARF-GFP cells respectively; quantitation shown in fold change on the right. **e**, Immunoblots showing increase in  $\beta$ -catenin and its target proteins *viz.* survivin, cyclin D1, and SMAD-2/3 in SKOV-3 CARF-GFP cells.

**Supplementary Figure 7. a**, Immunoblots showing expression levels of  $\beta$ -catenin and its targets proteins in Control (NT), IWP2 and PP treated SKOV-3 pCXNeo Control and CARF-GFP cells. **b**, Immunoblots for  $\beta$ -catenin, survivin and SMAD2/3 in iCRT14

treated cells; quantitation is shown on the right. **c.**  $\beta$ -catenin immunostaining in IWP2 and PP treated SKOV-3 pCXNeo Control and CARF-GFP cells.

**Supplementary Figure 8. a,** Immunoblots showing CARF knockdown in invasive fibrosarcoma (HT-1080) and breast carcinoma (MDA-MB-231) cell lines with CARF siRNA doses (10-50 pMoles). **b,** wound healing assay showing a progressively reduced cell migration on increasing CARF siRNA doses (10-50 pMoles), as observed at 48 h time point in MDA-MB-231 cells; while, **c-d,** showing cell morphology and quantitation of percentage scratched or covered area at 48 h time point in these cells upon CARF knockdown.

**Supplementary Figure 9. a,** mRNA expression levels of the transcription factors (SNAIL1, SNAIL2, ZEB1, and TWIST1) and CDH1, ACTA2 gene validated in control and CARF siRNA transfected U2OS cells; while **b,** showing transcript levels of  $\beta$ -catenin target gene (WNT1, CTNBB1, DVL2, AXIN2, TCF4, LEF1, and CCND1) in these cells. **c,** Transcript levels of TGF $\beta$ 1, TGFBR1, AKT, and FAK in control and CARF siRNA transfected U2OS cells; quantitation is plotted as fold change on the right. **d,** Immunostaining showing reduced nuclear SMAD-2/3 expression in CARF knockdown cells, as compared to transfected control U2OS cells.

**Supplementary Table S1:** Detail of antibodies used in immunoblotting and immunofluorescence assays.

| Antibody                     | Source         | Catalog number |
|------------------------------|----------------|----------------|
| E-cadherin                   | Santa Cruz     | sc-21791       |
| N-cadherin                   | Cell Signaling | #13116         |
| Fibronectin                  | Santa Cruz     | sc-52331       |
| Kinesin (H1)                 | Chemicon       | #MAB1613       |
| Vimentin (H-84)              | Santa Cruz     | sc-5565        |
| MMP2                         | Santa Cruz     | sc-10736       |
| MMP-9 (G657)                 | Cell Signaling | #2270S         |
| hnRNP-K                      | Santa Cruz     | CS#4675S       |
| uPA                          | Abcam          | ab169754       |
| $\beta$ -catenin             | Santa Cruz     | sc-7963        |
| Survivin                     | Santa Cruz     | sc-17779       |
| Cyclin D1                    | Santa Cruz     | sc-450         |
| TGF- $\beta$ 1               | Santa Cruz     | sc-146         |
| SMAD2/3                      | Cell Signaling | #8685          |
| Wnt1                         | Santa Cruz     | sc-514531      |
| c-Myc (Y69)                  | Abcam          | ab32072        |
| VEGF(A-20)                   | Santa Cruz     | sc-152         |
| Dynein                       | Abcam          | ab23905        |
| $\beta$ -actin-HRP           | Abcam          | ab49900        |
| Ant-Mouse-HRP                | Santa Cruz     | sc-2005        |
| Ant-Rabbit-HRP               | Santa Cruz     | sc-2004        |
| Anti-Mouse Alexa Fluor® 488  | Thermo-Fisher  | A11029         |
| Anti-Mouse Alexa Fluor® 594  | Thermo-Fisher  | A11032         |
| Anti-Rabbit Alexa Fluor® 488 | Thermo-Fisher  | A11034         |
| Anti-Rabbit Alexa Fluor® 594 | Thermo-Fisher  | A11037         |

**Antibody produced indigenously (usage details below)-**

|                  |                |                    |
|------------------|----------------|--------------------|
| Rabbit anti-CARF | Immunoblotting | Immunofluorescence |
|                  | 1:2500         | 1:100              |

**Supplementary Table S2:** Details of primers used for Genomic, Quantitative and RT-PCR amplifications.

**Details of primers used for Genomic-PCR amplifications**

| <i>Primers</i> | <i>Primer/Nucleotides Sequence from 5'-3'</i> | <i>Annealing temp</i> |
|----------------|-----------------------------------------------|-----------------------|
| CARF_F         | 5'-GTTCTTGGCGGTTGGTTCAC-3'                    | 60°C                  |
| CARF_R         | 5'-TCCCTCTTTTCTTCACCTTGGC-3'                  |                       |
| GAPDH_F        | 5'-CATCCCTTCTCCCCACACAC-3'                    | 58°C                  |
| GAPDH_R        | 5'-AGTCCAGGGCTTTGATTTG-3'                     |                       |

**Details of primers used for qPCR amplifications**

| <i>Primers</i> | <i>Primer/Nucleotides Sequence from 5'-3'</i> | <i>Annealing temp</i> |
|----------------|-----------------------------------------------|-----------------------|
| CARF_F         | 5'-TCAAAGTGACAGATGCTCCAAC-3'                  | 60°C                  |
| CARF_R         | 5'-GGTTTTTGCGTGATCTTGCTC-3'                   |                       |
| CK8-F          | 5'-CAG AAGTCCTACAAGGTGTCCA-3'                 | 60°C                  |
| CK8-R          | 5'-CTCTGGTTGACCGTAACTGCG-3'                   |                       |
| CK14-F         | 5'-AGGACCTGAAGAGCAAGATC-3'                    | 60°C                  |
| CK14-R         | 5'-TCCTTGAGGCTCTCAATCTG-3'                    |                       |
| CK18-F         | 5'-ATGACACCAACATCACAAGG-3'                    | 60°C                  |
| CK18-R         | 5'-ATCCACTTCCACAGTCAATC-3'                    |                       |
| WNT3A-F        | 5'-CAAGATTGGCATCCAGGAGT-3'                    | 60°C                  |
| WNT3A-R        | 5'-TCCCTGGTAGCTTTGTCCAG-3'                    |                       |
| GAPDH-F        | 5'-TGGAAATCCCATCACCATCT-3'                    | 60°C                  |
| GAPDH-R        | 5'-TTCACACCCATGACGAACAT-3'                    |                       |

**Details of primers used for RT (Reverse Transcriptase) - PCR amplifications**

| <i>Primers</i> | <i>Primer/Nucleotides Sequence from 5'-3'</i> | <i>Annealing temp</i> |
|----------------|-----------------------------------------------|-----------------------|
| SNAI1_F        | 5'-CAGACCCACTCAGATGTCAA-3'                    | 60°C                  |
| SNAI1_R        | 5'-CATAGTTAGTCACACCTCGT-3'                    |                       |
| SNAI2_F        | 5'-GGTCAAGAAGCATTTC AAC-3'                    | 60°C                  |
| SNAI2_R        | 5'-GGTAATGTGTGGGTCCGA-3'                      |                       |
| ZEB1_F         | 5'-TTCAAACCCATAGTGGTTGCT-3'                   | 60°C                  |
| ZEB1_R         | 5'-TGGGAGATACCAAACCAACTG-3'                   |                       |
| TWIST_F        | 5'-GGGAGTCCGCAGTCTTAC-3'                      | 60°C                  |
| TWIST_R        | 5'-CCTGTCTCGCTTTCTCTTT-3'                     |                       |
| WNT1_F         | 5'-TGGCCGATGGTGGGGTATTGTGA-3'                 | 66°C                  |
| WNT1_R         | 5'-CGGCCTGCCTCGTTGTTGTGAA-3'                  |                       |
| CTNNB1_F       | 5'-TGATGGAGTTGGACATGGCCATGG-3'                | 60°C                  |
| CTNNB1_R       | 5'-CAGACACCATCTGAGGAGAACGCA-3'                |                       |
| DVL2_F         | 5'-CCGTCATGTGCTTGCTCTTA-3'                    | 60°C                  |
| DVL2_R         | 5'-TGGAGGAGGAGGTCACATTC-3'                    |                       |
| AXIN2_F        | 5'-GTTGGTGA CTTGCC TCCCGGACCC-3'              | 60°C                  |
| AXIN2_R        | 5'-GAGTGTAAGGACTTGGTCCACCGG-3'                |                       |
| TCF4_F         | 5'-CCGATGACGAGGGTGATGAG-3'                    | 60°C                  |
| TCF4_R         | 5'-CCGAGGACACCTTCTCTTCC-3'                    |                       |
| LEF1_F         | 5'-TTCAAGGACGAGGGCGAT-3',                     | 60°C                  |
| LEF1_R         | 5'-TGTACCCGGAATAACTCG-3'                      |                       |
| CDH1_F         | 5'-GAGAACGCATTGCCACATAC-3'                    | 60°C                  |
| CDH1_R         | 5'-GAAGAGCACCTTCCATGACA-3'                    |                       |
| TGFB1_F        | 5'-TGGCGATACCTCAGCAACC-3'                     | 61°C                  |
| TGFB1_R        | 5'-CTCGTGGATCCACTTCCAG-3'                     |                       |
| TGFBR1_F       | 5'-ACGGCGTTACAGTGTTCTG-3'                     | 63°C                  |
| TGFBR1_R       | 5'-GGTGTGGCAGATATAGACC-3'                     |                       |
| AKT_F          | 5'-GCAGCACGTGTACGAGAAGA-3'                    | 60°C                  |
| AKT_R          | 5'-GGTGTCACTCTCCGACGTG-3'                     |                       |
| FAK_F          | 5'-GGTGCAATGGAGCGAGTATT-3'                    | 60°C                  |
| FAK_R          | 5'-GCCAGTGAACCTCCTCTGA-3'                     |                       |
| ACTA2_F        | 5'-ACCCACAATGTCCCCATCTA-3'                    | 60°C                  |
| ACTA2_R        | 5'-TGATCCACATCTGCTGGAAG-3'                    |                       |
| CCND1_F        | 5'-ATGGAACACCAGCTCCTGTGCTGCG-3'               | 60°C                  |
| CCND1_R        | 5'-TCCAGGTAGTTCATGGCCAGCGGG-3'                |                       |
| CARF_F         | 5'-TCAAAGTGACAGATGCTCCA-3'                    | 60°C                  |
| CARF_R         | 5'-CGTTGAACTGTTTTCTGCT-3'                     |                       |

**a**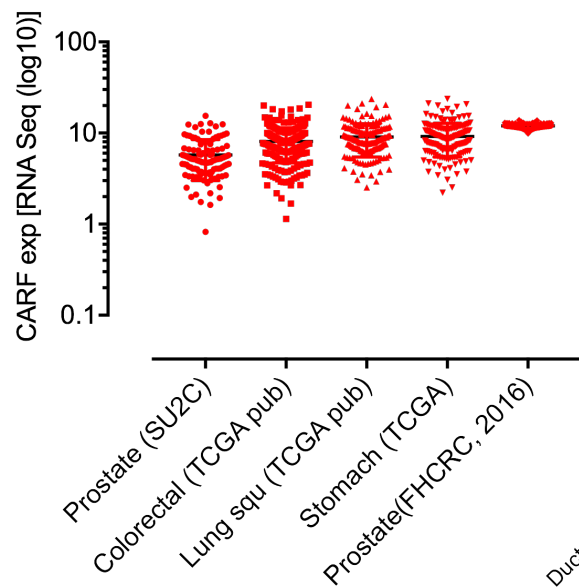**b**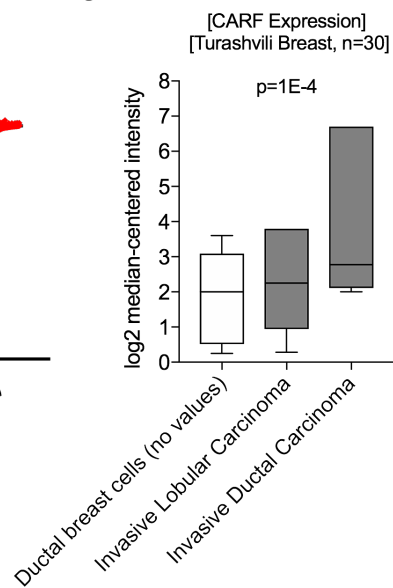**c**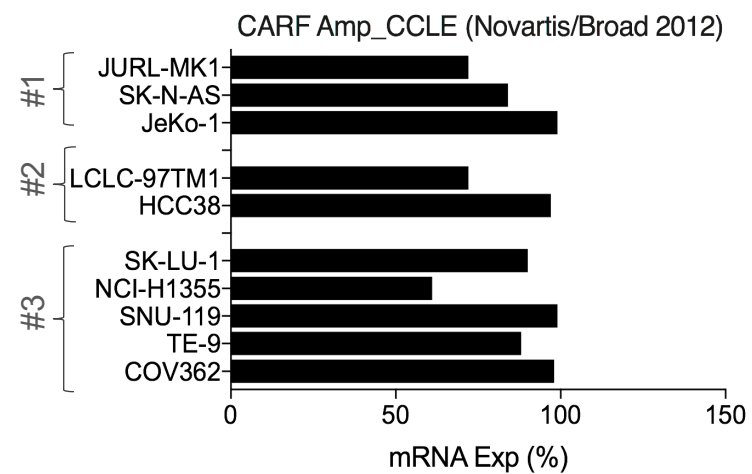

a

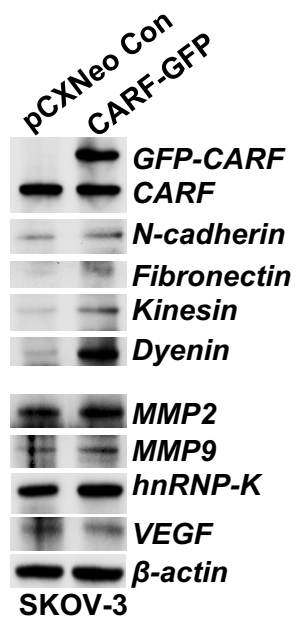

b

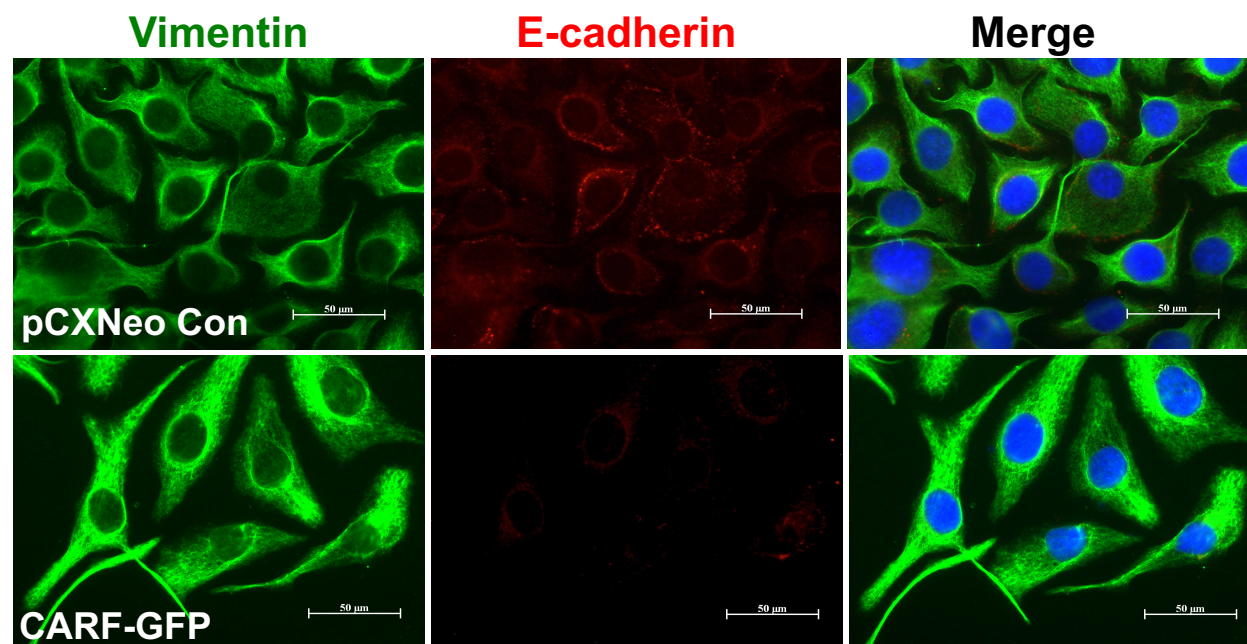

c

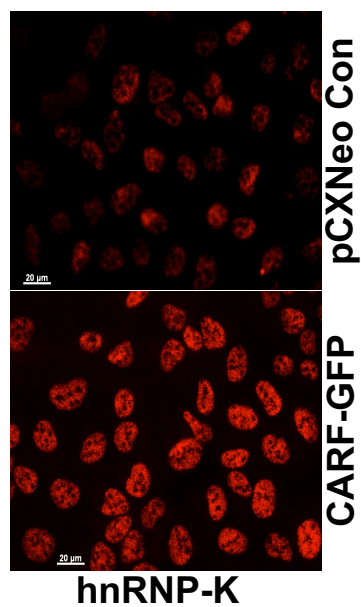

SKOV-3

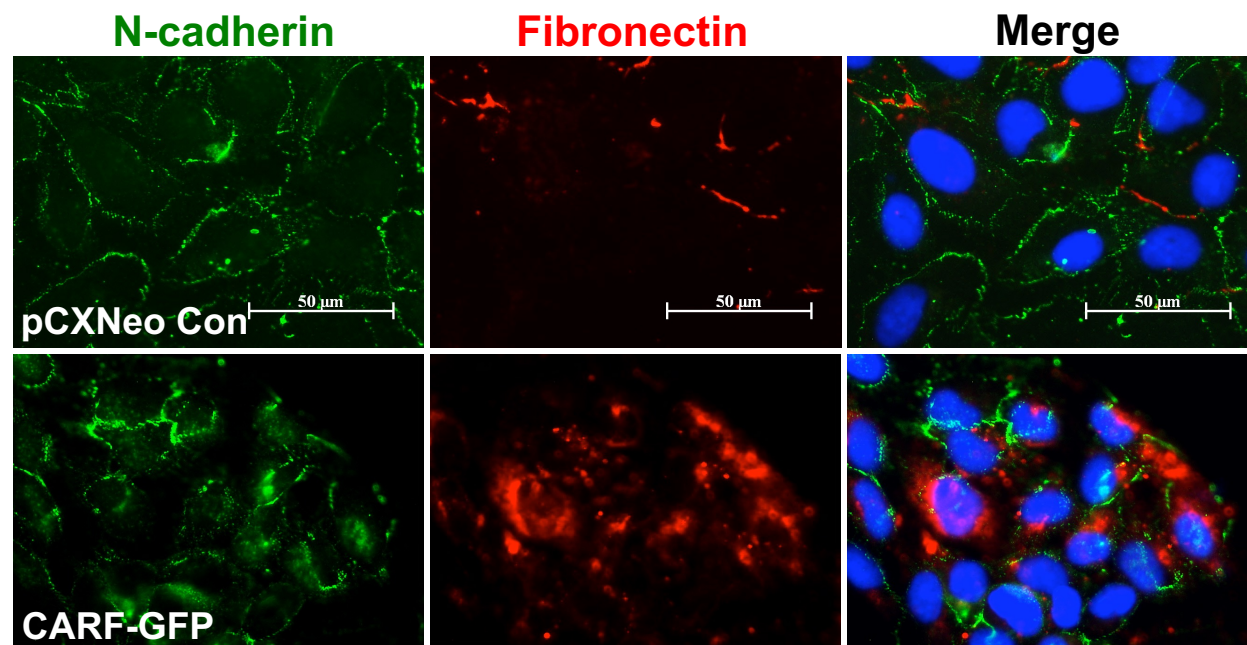

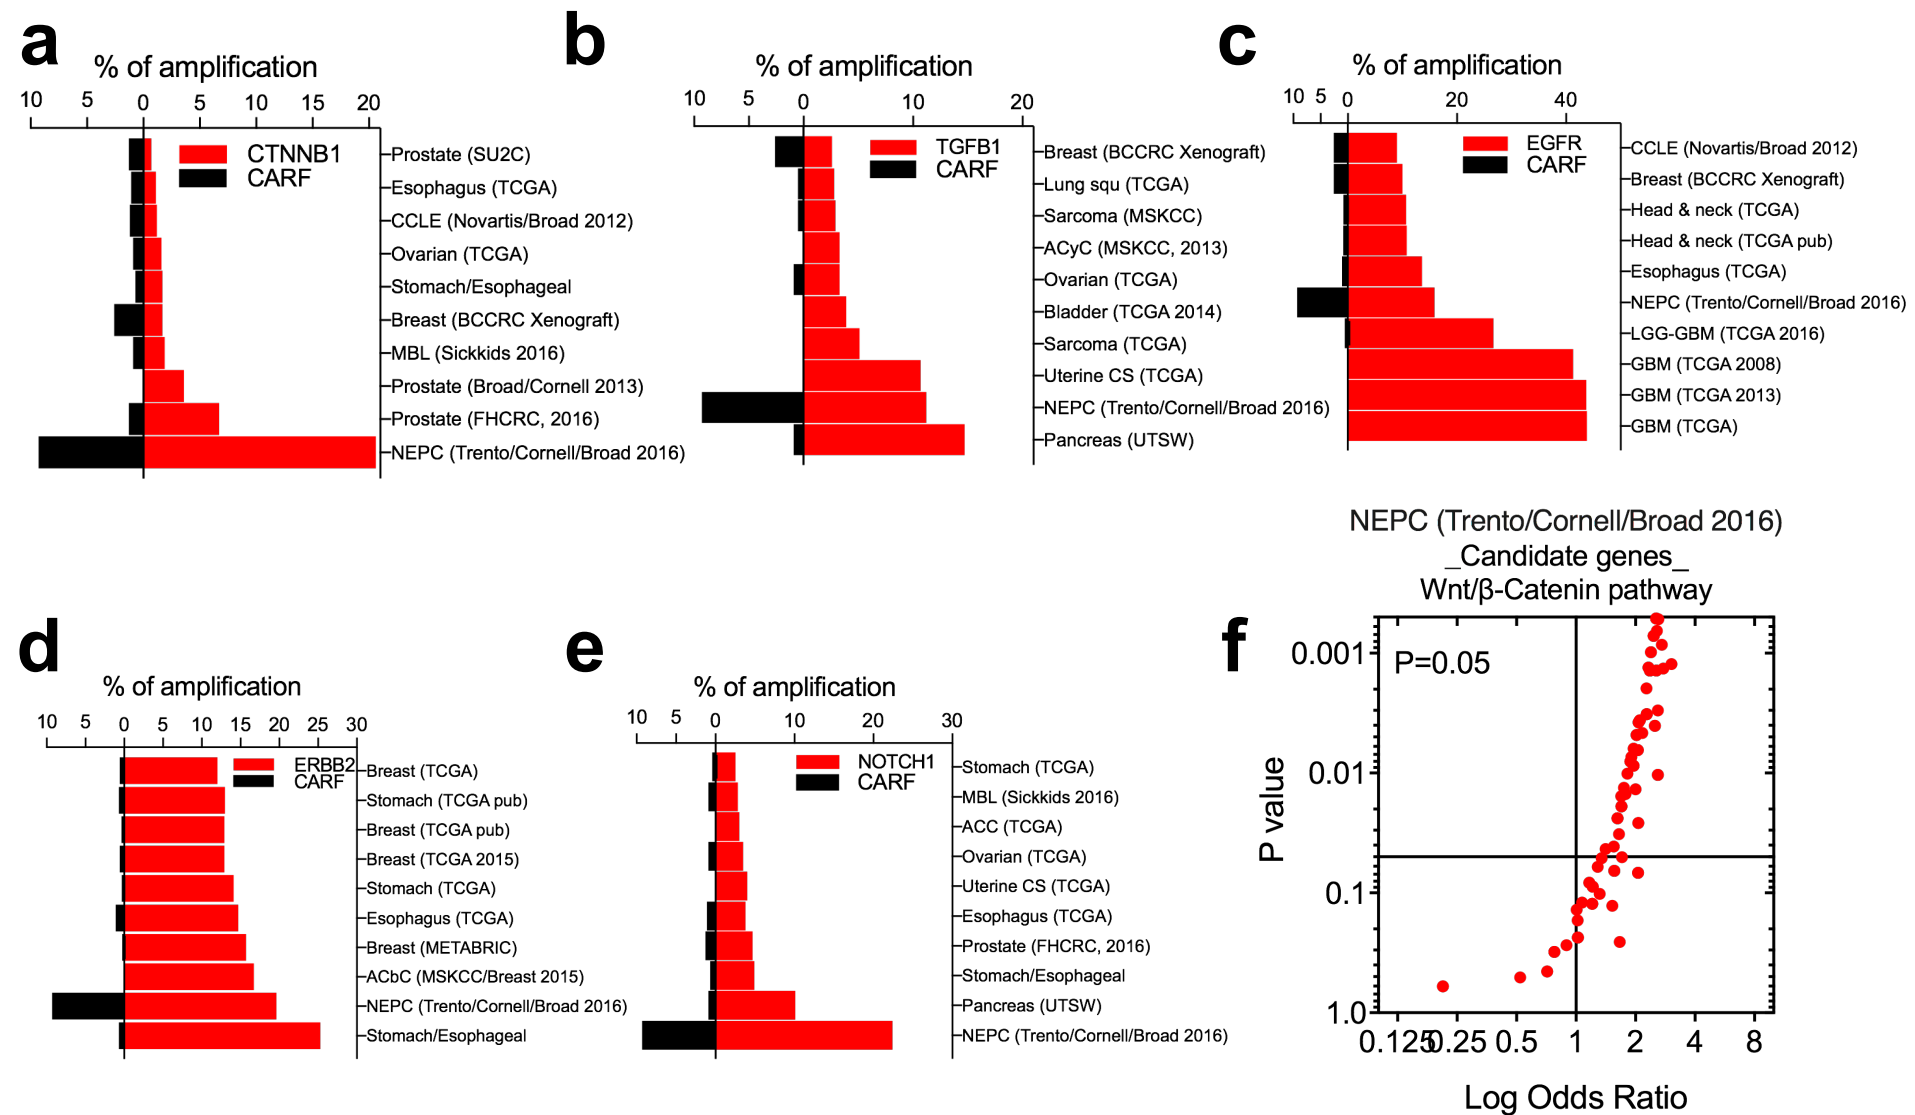



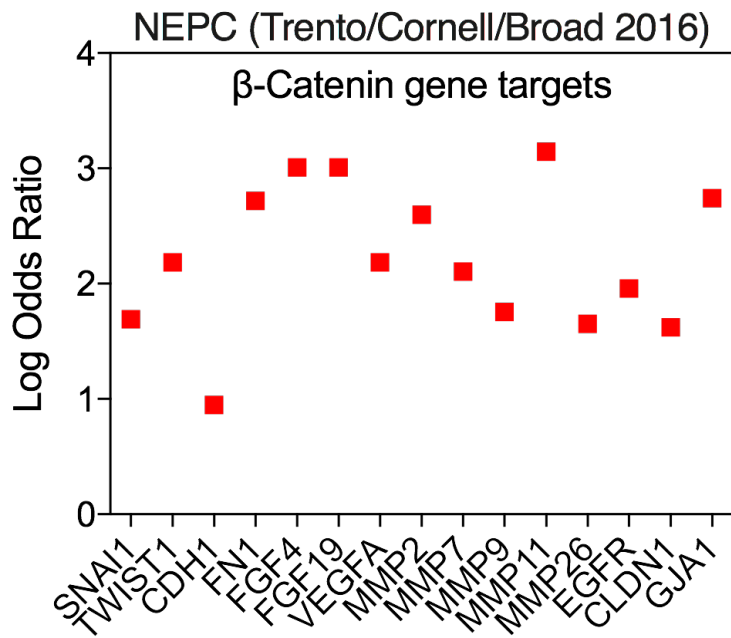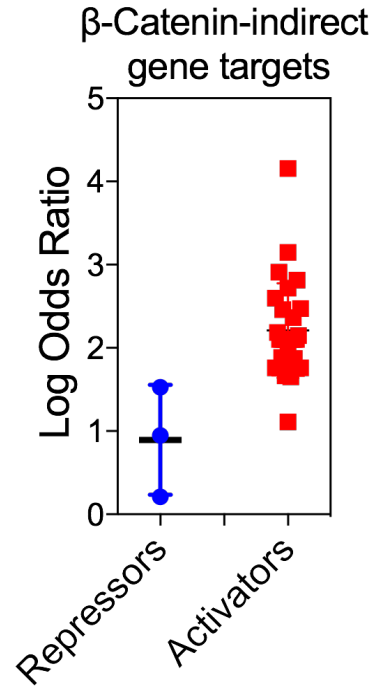

$\beta$ -catenin direct targets (EMT)

SNAI1  
 TWIST1  
 CDH1  
 FN1  
 FGF4  
 FGF19  
 FGF20  
 VEGFA  
 MMP2  
 MMP7  
 MMP9  
 MMP11  
 MMP26  
 EGFR  
 CLDN1  
 GJA1

$\beta$ -catenin indirect targets (EMT)

| <i>Repressors</i> | <i>Activators</i> |
|-------------------|-------------------|
| CDH1              | VTN               |
| OCN               | CDH2              |
| TJP1              | COL1A1            |
|                   | TWIST2            |
|                   | ZEB1              |
|                   | ZEB2              |
|                   | NEDD9             |
|                   | FOXC2             |
|                   | FOXO3A            |

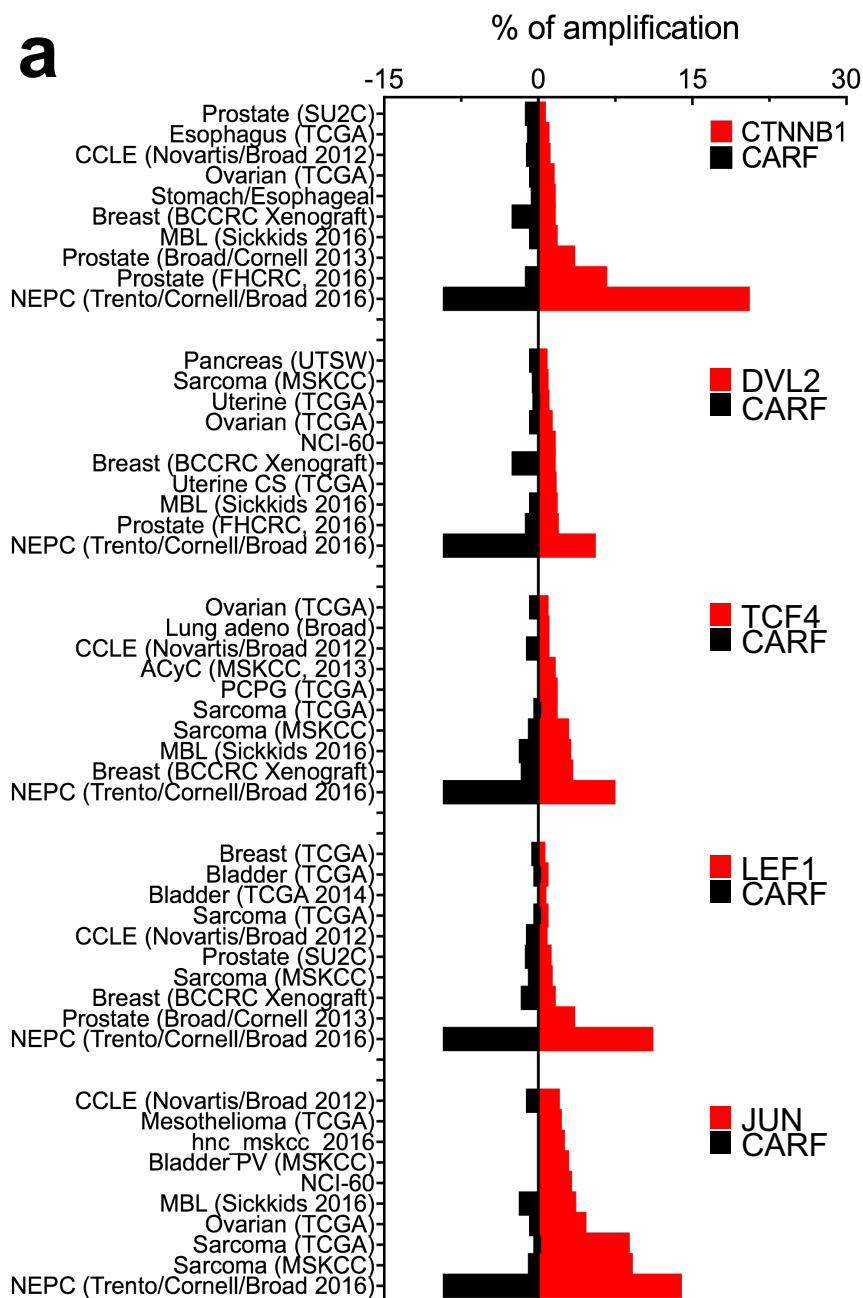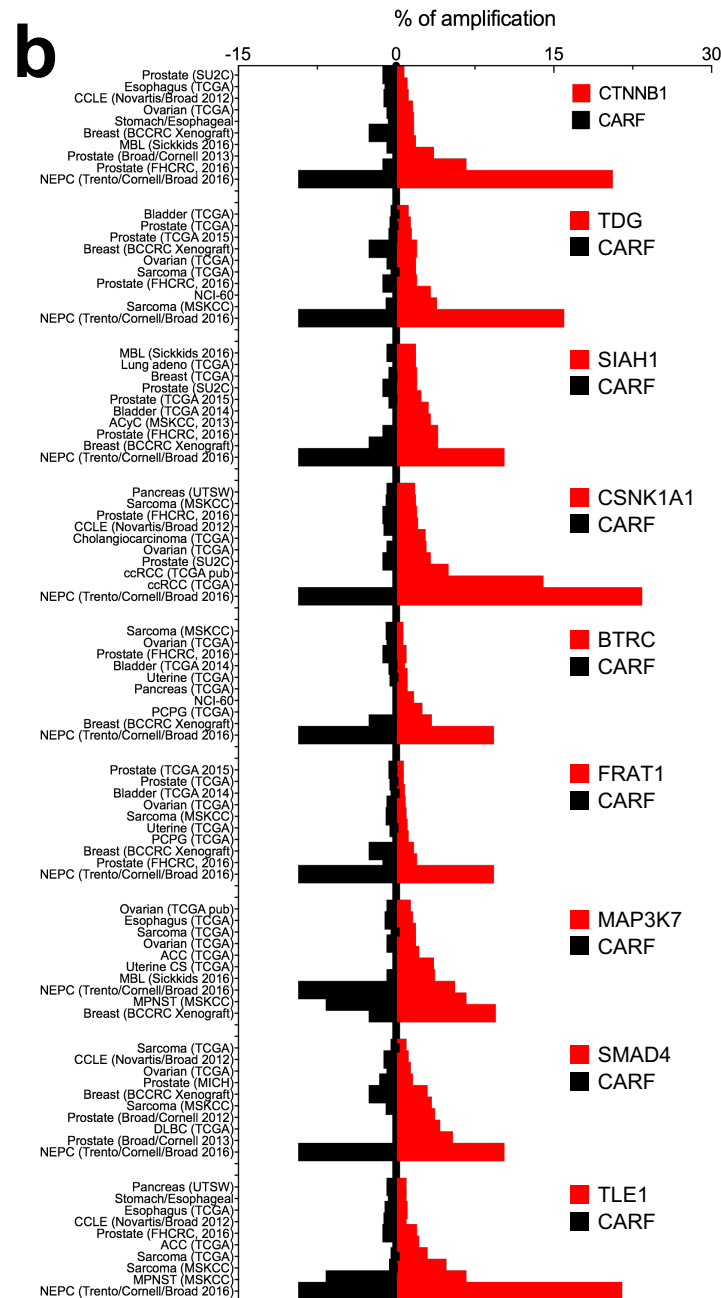

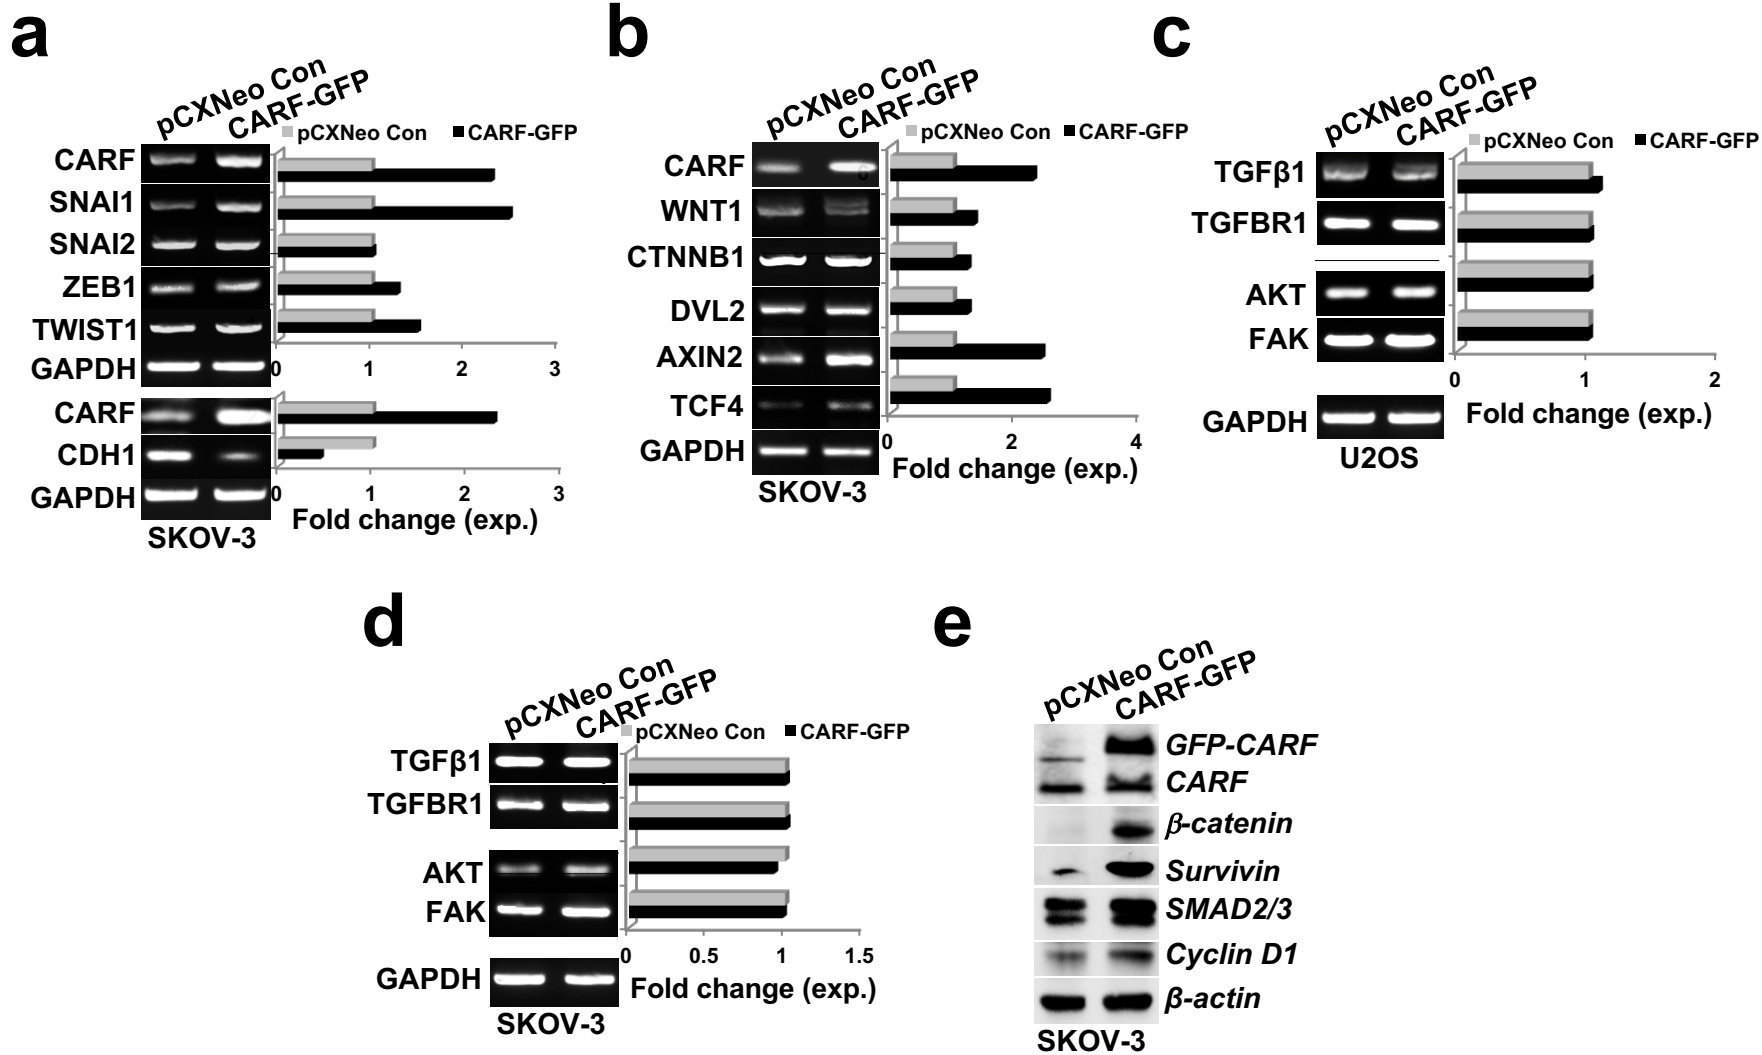

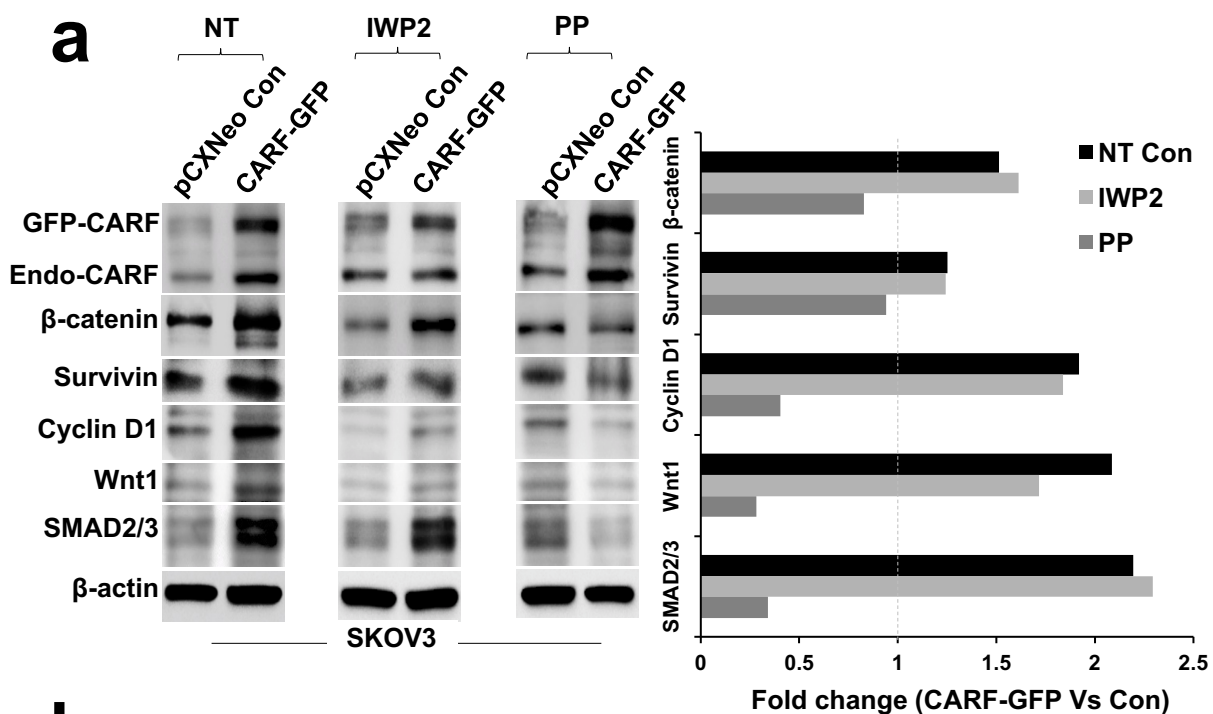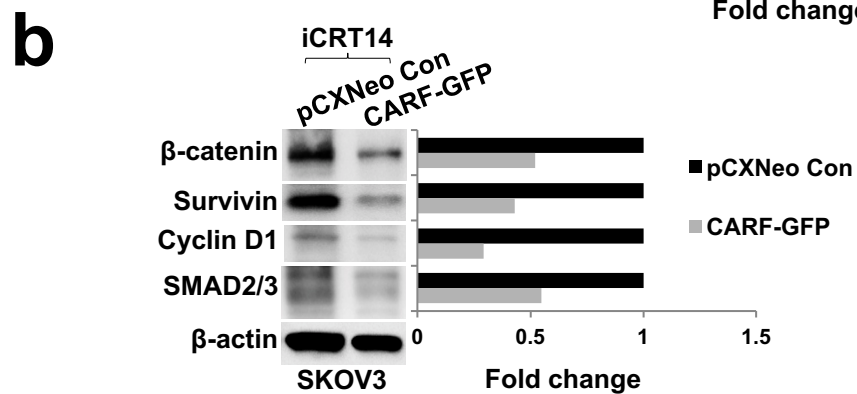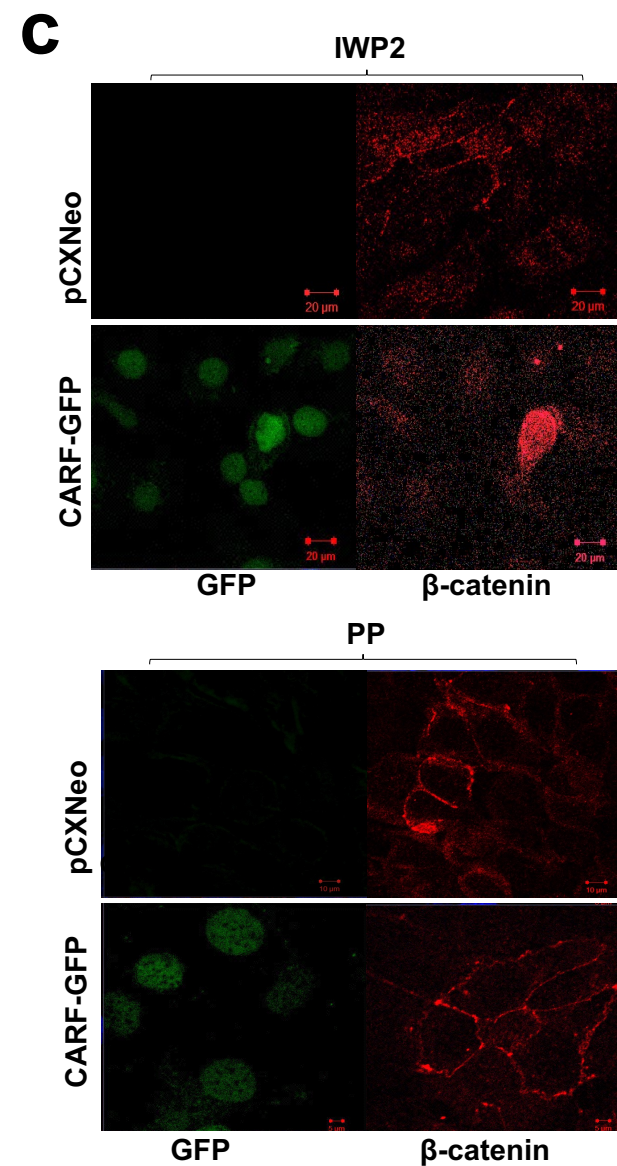

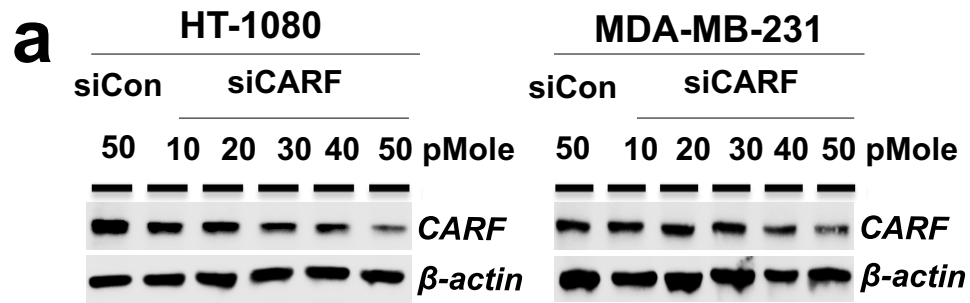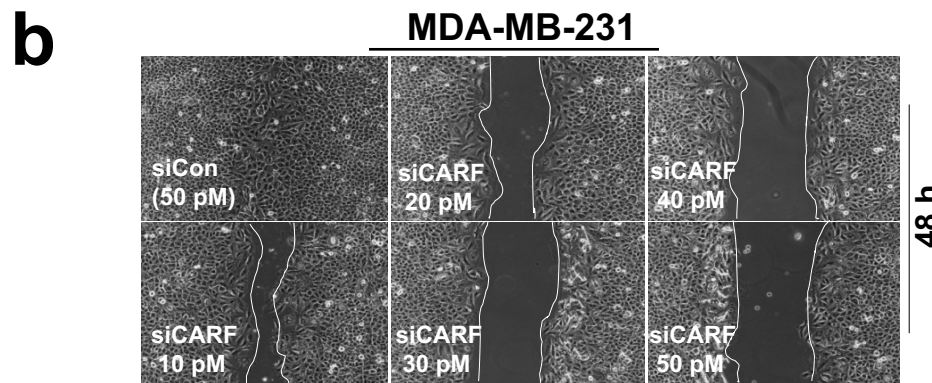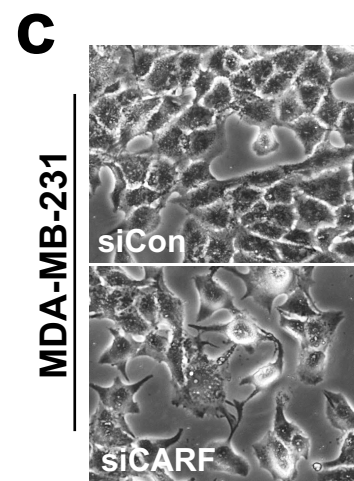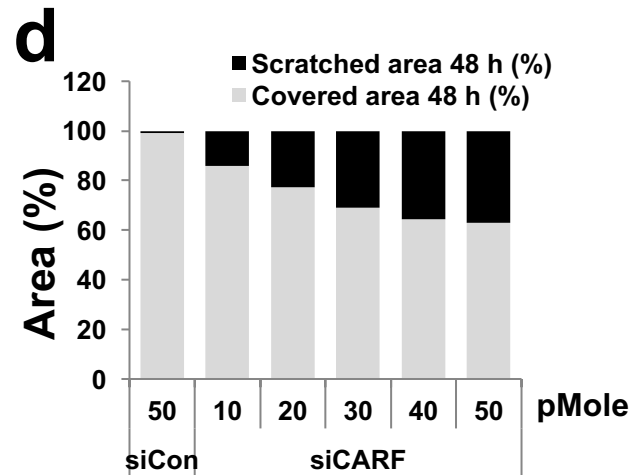

**a**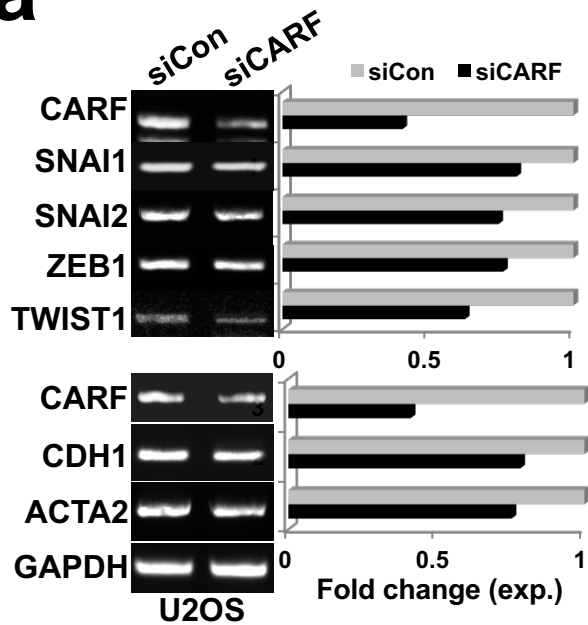**b**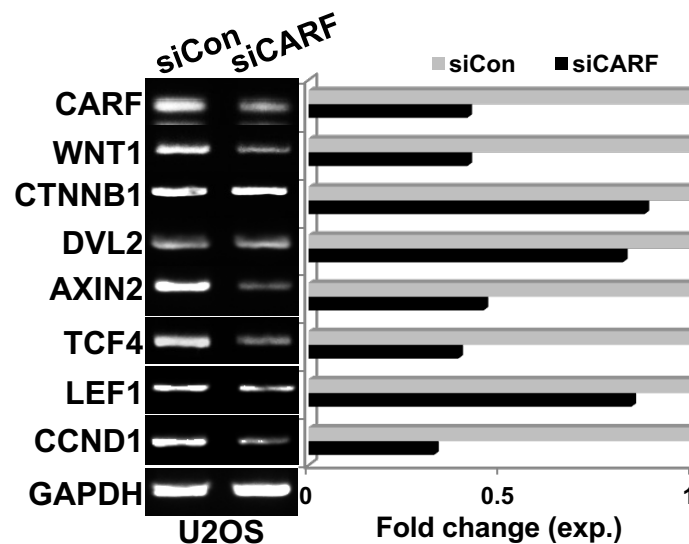**c**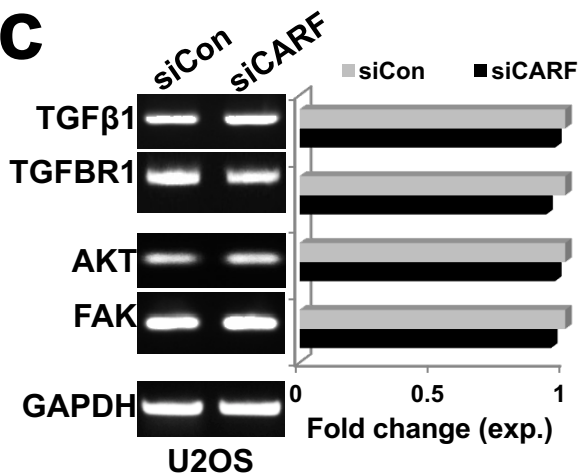**d**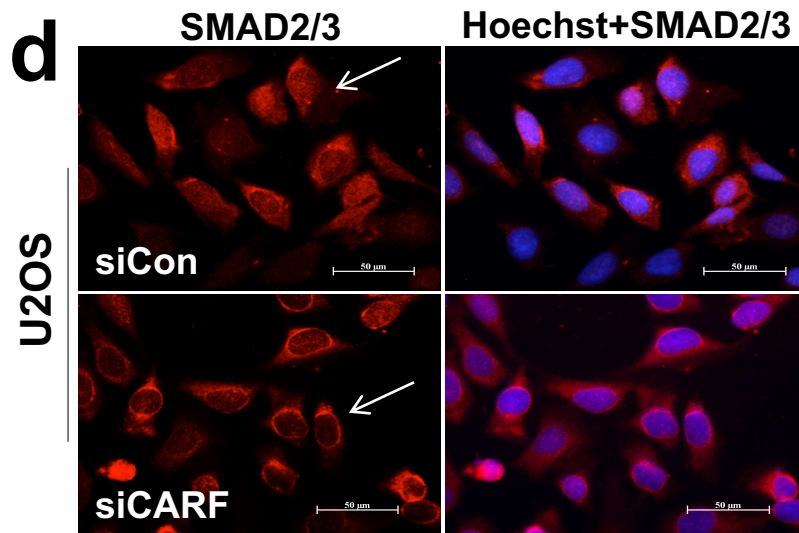

Supplement: 41389_2018_48_MOESM1_ESM.pdf [file 41389_2018_48_MOESM1_ESM.pdf]
